# Supplementary material for: Nematophin, an Antimicrobial Dipeptide Compound From Xenorhabdus nematophila YL001 as a Potent Biopesticide for Rhizoctonia solani Control
Source: PubMed Central journal article supplement (PMC6693444; doi:10.3389/fmicb.2019.01765), 2019-08-07
Supplement: Data_Sheet_1.pdf [file Data_Sheet_1.pdf]

---

## Supporting Information

### **Nematophin, an antimicrobial dipeptide compound from *Xenorhabdus nematophila* YL001 as a potent biopesticide for *Rhizoctonia solani* control**

*Shujing Zhang*<sup>1</sup>, *Qi Liu*<sup>2</sup>, *Yunfei Han*<sup>1</sup>, *Jinghua Han*<sup>1</sup>, *Yonghong Wang*<sup>1\*</sup> and *Xing Zhang*<sup>1</sup>

<sup>1</sup>Research and Development Center of Biorational Pesticides, Key Laboratory of Plant Protection Resources and Pest Management of Ministry of Education, College of Plant Protection, Northwest A&F University, 22 Xinong Road, Yangling, Shaanxi 712100, China

<sup>2</sup>Plant quarantine and protection bureau of Zhumadian, Henan 463000, China

\*Correspondence:

Yonghong Wang (yhwang@nwafu.edu.cn)

---

## **Table of contents**

- 1. Synthesis of ( $\pm$ )-Nematophin and (+)-Nematophin**
- 2. Biochemical and molecular characteristics of *X. nematophila* YL001 (Table S1 and S2; Figure S1)**
- 3. Table S3**
- 4. Figure S2 and Figure S3**
- 5.  $^1\text{H}$  NMR,  $^{13}\text{C}$  NMR and MS spectra (Figure S4-S28)**

## 1. Synthesis of (±)-Nematophin

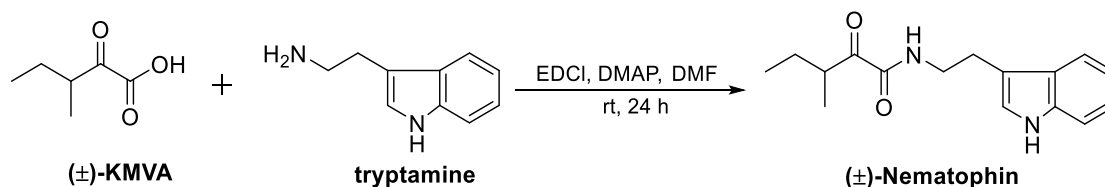

Scheme S1. Synthetic route for the preparation of the target compound (±)-Nematophin

Ethyl-dimethylaminopropyl-carbodiimide hydrochloride (EDCI, 2.4 mmol, 1.2 equiv) and N, N-dimethyl-4-aminopyridine (DMAP, 0.4 mmol, 0.2 equiv) were added into an ice-cooled solution of (±)-2-keto-3-methylvaleric acid ((±)-KMVA, 2 mmol, 260.3 mg) in N, N-dimethylformamide (DMF, 5 mL) and the mixture was stirred at 0 °C for 30 min. Then, tryptamine (2.4 mmol, 1.2 equiv) was added into the mixture. After being stirred at 0 °C for another 30 min, the mixture was allowed to warm to 25 °C and then stirred for 24 h. The resulting solution was added into 20 mL of distilled water and extracted with ethyl acetate (3 × 20 mL). The organic layer was collected, dried over anhydrous Na<sub>2</sub>SO<sub>4</sub>, filtered, and concentrated *in vacuo* to afford a yellow residue. The residue was purified by silica gel chromatography (petroleum ether/EtOAc, 5:1, V/V) to yield (±)-Nematophin (0.34 g, 62.5%) as a white solid. <sup>1</sup>H NMR (500 MHz, CDCl<sub>3</sub>) δ 8.15 (bs, 1H), 7.65 (d, *J* = 7.9 Hz, 1H), 7.42 (d, *J* = 8.1 Hz, 1H), 7.26 (t, *J* = 7.6 Hz, 1H), 7.18 (t, *J* = 7.5 Hz, 1H), 7.11 (bs, 1H), 7.08 (d, *J* = 1.5 Hz, 1H), 3.69 (q, *J* = 6.7 Hz, 2H), 3.59 – 3.49 (m, 1H), 3.07 (t, *J* = 6.9 Hz, 2H), 1.83 – 1.71 (m, 1H), 1.50 – 1.37 (m, 1H), 1.13 (d, *J* = 6.9 Hz, 3H), 0.94 (t, *J* = 7.4 Hz, 3H); <sup>13</sup>C NMR (125 MHz, CDCl<sub>3</sub>) δ 202.39, 160.08, 136.47, 127.18, 122.34, 122.04, 119.61, 118.67, 112.56, 111.30, 40.40, 39.55, 25.46, 25.19, 15.17, 11.50; ESI-MS (*m/z*): [M+Na]<sup>+</sup> calculated for

---

$C_{16}H_{20}N_2NaO_2$  295.14, found 295.10;  $[M-H]^-$  calculated for  $C_{16}H_{19}N_2O_2$  271.14, found 271.11.

## 2. Synthesis of (+)-Nematophin

### 2.1 (2*S*, 3*S*)-2-Hydroxy-3-methylpentanoic Acid (**a**) (Paik et al., 2003)

6.2 g of  $NaNO_2$  (89.8 mmol) was added into an ice-cooled (0 °C) solution of L-isoleucine (1.96 g, 15 mmol) in 0.5 M  $H_2SO_4$  (60 mL) over a period of 1 h. After that, the mixture was allowed to warm to 25 °C and stirred for another 24 h. The resulting solution was extracted with ether (3 × 20 mL). Then, the organic extracts were collected, dried by anhydrous  $Na_2SO_4$ , filtered, and evaporated *in vacuo* to give a yellow oil. Purification was performed by crystallization from ether and petroleum ether to give **a** (1.5 g, 75.8%) as a white solid.  $[\alpha]_D^{25}$ : 20.18 (c 4,  $CHCl_3$ );  $^1H$  NMR (500 MHz,  $CDCl_3$ )  $\delta$  4.19 (d,  $J = 3.4$  Hz, 1H), 1.84 – 1.96 (m, 1H), 1.50 – 1.38 (m, 1H), 1.37 – 1.22 (m, 1H), 1.03 (d,  $J = 6.9$  Hz, 3H), 0.93 (t,  $J = 7.4$  Hz, 3H);  $^{13}C$  NMR (125 MHz,  $CDCl_3$ )  $\delta$  179.58, 74.66, 38.91, 23.68, 15.34, 11.73.

### 2.2 (2'*S*, 3'*S*)-N-(Indol-3-ylethyl)-2'-hydroxy-3'-methylpentan-amide (**b**)

The synthetic procedure of **b** was identical to that of ( $\pm$ )-Nematophin except N-Hydroxysuccinimide (NHS, 1.2 equiv) and 2-hydroxy-isoleucic acid (**a**, 1 equiv) being used. The crude product was purified by chromatography on silica gel ( $CH_2Cl_2/MeOH$ , 50:1, V/V) to yield **b** (0.28 g, 61.3%) as a white solid.  $[\alpha]_D^{25}$ : -4.51 (c 1.55,  $CHCl_3$ );  $^1H$  NMR (500 MHz,  $CDCl_3$ )  $\delta$  8.19 (bs, 1H), 7.60 (d,  $J = 7.8$  Hz, 1H), 7.35 (d,  $J = 8.1$  Hz, 1H), 7.20 (t,  $J = 7.3$  Hz, 1H), 7.12 (t,  $J = 7.3$  Hz, 1H), 6.99 (d,  $J = 2.2$  Hz 1H), 6.54 (bs,

---

1H), 3.90 (dd,  $J = 5.0, 3.5$  Hz, 1H), 3.62 (q,  $J = 6.6$  Hz, 2H), 3.03 – 2.91 (m, 2H), 2.73 (d,  $J = 5.3$  Hz, 1H), 1.86 – 1.76 (m, 1H), 1.39 – 1.27 (m, 1H), 1.17 – 1.04 (m, 1H), 0.94 (d,  $J = 6.9$  Hz, 3H), 0.85 (t,  $J = 7.4$  Hz, 3H);  $^{13}\text{C}$  NMR (125 MHz,  $\text{CDCl}_3$ )  $\delta$  173.27, 136.44, 127.32, 122.22, 122.09, 119.47, 118.68, 112.83, 111.34, 76.36, 39.31, 38.77, 25.44, 23.06, 15.61, 11.88; ESI-MS ( $m/z$ ):  $[\text{M}+\text{Na}]^+$  calculated for  $\text{C}_{16}\text{H}_{22}\text{N}_2\text{NaO}_2$  297.15, found 297.10.

### 2.3 (+)-Nematophin (Paik et al., 2003)

200 mg of Dess-Martin reagent (periodinane, 0.47 mmol) was added into a solution of **b** (100 mg, 0.36 mmol) in 5 mL of  $\text{CH}_2\text{Cl}_2$ . The mixture was stirred for 20 min at 25 °C. The resulting solution was filtered through Celite, and the solvent was removed by vacuum rotary evaporation. The residue was purified on a silica gel column eluted with a petroleum ether-EtOAc mixture (5:1, V/V) to afford 49.2 mg (50.3%) of (+)-Nematophin as a white solid.  $[\alpha]_{\text{D}}^{25}$ : 31.66 (c 0.58,  $\text{CHCl}_3$ );  $^1\text{H}$  NMR (500 MHz,  $\text{CDCl}_3$ )  $\delta$  8.11 (bs, 1H), 7.60 (d,  $J = 7.9$  Hz, 1H), 7.37 (d,  $J = 8.1$  Hz, 1H), 7.21 (t,  $J = 7.3$  Hz, 1H), 7.13 (t,  $J = 7.4$  Hz, 1H), 7.05 (bs, 1H), 7.03 (d,  $J = 1.7$  Hz, 1H), 3.64 (q,  $J = 6.7$  Hz, 2H), 3.50 (h,  $J = 6.8$  Hz, 1H), 3.02 (t,  $J = 6.9$  Hz, 2H), 1.78 – 1.66 (m, 1H), 1.45 – 1.33 (m, 1H), 1.08 (d,  $J = 6.9$  Hz, 3H), 0.88 (t,  $J = 7.4$  Hz, 3H);  $^{13}\text{C}$  NMR (125 MHz,  $\text{CDCl}_3$ )  $\delta$  202.40, 160.07, 136.46, 127.17, 122.34, 122.07, 119.61, 118.68, 112.53, 111.32, 40.40, 39.55, 25.47, 25.20, 15.19, 11.54; ESI-MS ( $m/z$ ):  $[\text{M}+\text{H}]^+$  calculated for  $\text{C}_{16}\text{H}_{21}\text{N}_2\text{O}_2$  273.16, found 273.00;  $[\text{M}+\text{Na}]^+$  calculated for  $\text{C}_{16}\text{H}_{20}\text{N}_2\text{NaO}_2$  295.14, found 295.07;  $[\text{M}-\text{H}]^-$  calculated for  $\text{C}_{16}\text{H}_{19}\text{N}_2\text{O}_2$  271.14, found 271.10.

Table S1 Morphological characteristics of *X. nematophila* YL001 (Wang and Zhang, 2006)

| Symbiotic bacteria           | Gram           | shape | Size (µm)       | Spore |
|------------------------------|----------------|-------|-----------------|-------|
| <i>X. nematophilus</i> YL001 | G <sup>-</sup> | Rod   | 0.5×1.3-1.7×9.5 | None  |

Table S2 Biochemical characteristics of *X. nematophila* YL001 (Wang and Zhang, 2006)

| Physiological index         | Positive / negative reaction |
|-----------------------------|------------------------------|
| Catalase                    | -                            |
| Oxidase                     | -                            |
| Urease                      | -                            |
| Lecithinase                 | +                            |
| Protease                    | +                            |
| Gelatin                     | +                            |
| Lipase                      | -                            |
| Tween 80                    | -                            |
| Nitrate reduction           | -                            |
| Indole production           | -                            |
| H <sub>2</sub> S production | -                            |
| Voges-Prokauer test         | -                            |
| Starch hydrolysis-soluble   | -                            |
| Phenylalanine deaminase     | -                            |
| Tryptophan deaminase        | -                            |
| Aesculin hydrolysis         | -                            |
| D, L -Glycerate             | +                            |
| Simmon's citrate            | +                            |

Note: +: positive reaction ; -: negative reaction;

---

*Xenorhabdus nematophila* strain YL001 16S ribosomal RNA gene, partial sequence

AGATTGAACGCTGGCGGCAGGCCTAACACATGCAAGTCGGACGGTAACAGGAAA  
CAGCTTGCTGTTTTGCTGACGAGTGGCGGACGGGTGAGTAATGTCTGGGGATCTGCC  
GATGGAGGGGGATAACCACTGGAAACGGTGGCTAATACCGCATGACCTCTTGGGAGTA  
AAGTGGGGGACCTTCGGGCCTCACGCCATCGGATGAACCCAGATGGGATTAGCTAGTA  
GGCGGGGTAATGGCCCACCTAAGCGACGATCCCTAGCTGGTCTGAGAGGATGACCAGC  
CACACTGGGACTGAGACACGGCCCAGACTCCTACGGGAGGCAGCAGTGGGGAATATT  
GCACAATGGGCGCAAGCCTGATGCAGCCATGCCGCGTGTATGAAGAAGGCCTTCGGGT  
TGTAAGTACTTTTCAGCGGGGAGGAAGGCGTAAGTCTGAACAGGGCTTACGATTGACG  
TTACCCGCAGAAGAAGCACCGGCTAACTCCGTGCCAGCAGCCGCGGTAATACGGAGG  
GTGCAAGCGTTAATCGGAATTACTGGGCGTAAAGCGCACGCAGGCGGTCAATTAAGTT  
GGATGTGAAATCCCCGGGCTTAACCCAGGAACGGCATCCAAGACTGGTTGGCTAGAGT  
CTCGTAGAGGGGGGTAGAATTCCACGTGTAGCGGTGAAATGCGTAGAGATGTGGAGGA  
ATACCGGTGGCGAAGGCGGCCCCCTGGACGAAGACTGACGCTCAGGTGCGAAAGCGT  
GGGGAGCAAACAGGATTAGATACCCTGGTAGTCCACGCTGTAAACGATGTTCGATTTGG  
AGGCTGTGCCCTTGAGGCGTGGCTTCCGGAGCTAGCGCGTTAAATCGACCGCCTGGGG  
AGTACGGCCGCAAGGTTAAACTCAAATGAATTGACGGGGGCCCGCACAAGCGGTGG  
AGCATGTGGTTTAATTCGATGCAACGCGAAGAACCTTACCTACTCTTGACATCCACGGG  
ATCAGGCAGAGATGCCGGAGTGCCTTCGGGAACCGTGAGACAGGTGCTGCATGGCTG  
TCGTCAGCTCGTGTTGTGAAATGTTGGGTTAAGTCCCGCAACGAGCGCAACCCTTATC  
CTTTGTTGCCAGCACTTCGGGTGGGAACAAGGGAGACTGCCGGTGATAAACC GGA  
GGAAGGTGGGGATGACGTCAAGTCATCATGGCCCTTACGAGTAGGGCTACACACGTGC  
TACAATGGCAGATACAAAGAGAAGCGACCTCGCGAGAGCAAGCGGAACTCATAAAGT  
CTGTCTAGTCCGGATTGGAGTCTGCAACTCGACTCCATGAAGTCGGAATCGCTAGTA  
ATCGTAGATCAGAATGCTACGGTGAATACGTTCCCGGGCCTTGACACACCGCCCGTCA  
CACCATGGGAGTGGGTTGCAAAAGAAGTAGGTAGCTTAACCTTCGGGGGGGCGCTTAC  
CACTTTGTGATTCATGACTGGGGTGAAGTCGTAACAAGGTAACCGTAGGGGAACC

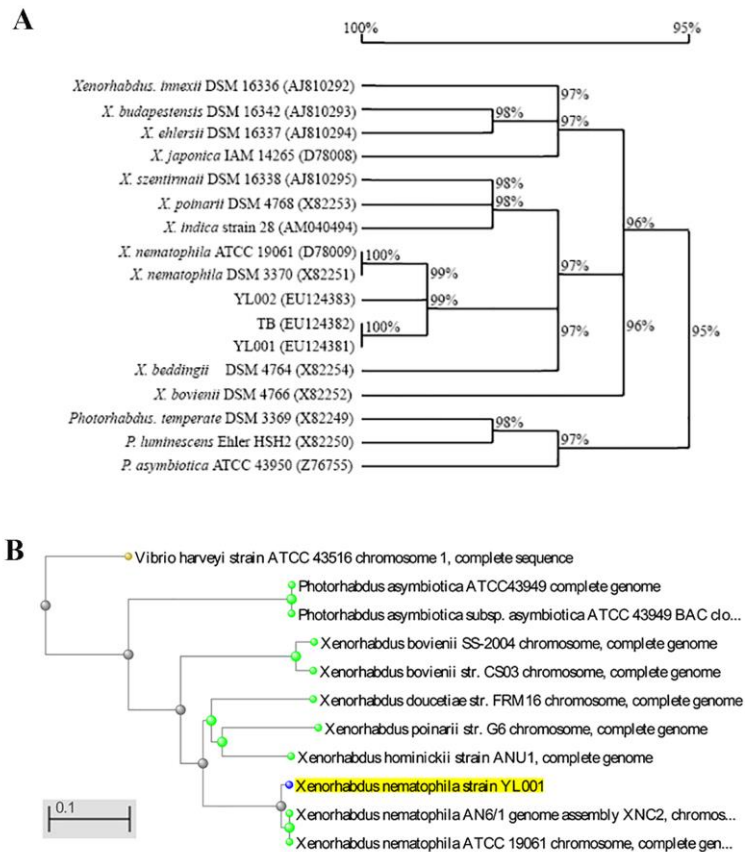

Figure S1 The homology trees of *Xenorhabdus nematophila* YL001 based on 16S rDNA (A) and the genome sequence (B).

Table S3 Pathogenic fungi and oomycetes used in this study

| Pathogenic fungi                | Host plant   | Geographic origins          |
|---------------------------------|--------------|-----------------------------|
| <i>Rhizoctonia solani</i>       | Rice         | Hanzhong (Shannxi province) |
| <i>Exserohilum turcicum</i>     | Corn         | Yangling (Shannxi province) |
| <i>Phytophthora infestans</i>   | Potato       | Yulin (Shannxi province)    |
| <i>Fusarium graminearum</i>     | Wheat        | Yangling (Shannxi province) |
| <i>Verticillium dahliae</i>     | cucumber     | Yangling (Shannxi province) |
| <i>Phytophthora capsici</i>     | Pepper       | Yangling (Shannxi province) |
| <i>Botrytis cinerea</i>         | Tomato       | Yangling (Shannxi province) |
| <i>Sclerotinia sclerotiorum</i> | Oilseed rape | Hanzhong (Shannxi province) |
| <i>Alternaria alternate</i>     | tobacco      | Mianchi (Henan province)    |
| <i>Gaeumannomyces graminis</i>  | Wheat        | Yangling (Shannxi province) |



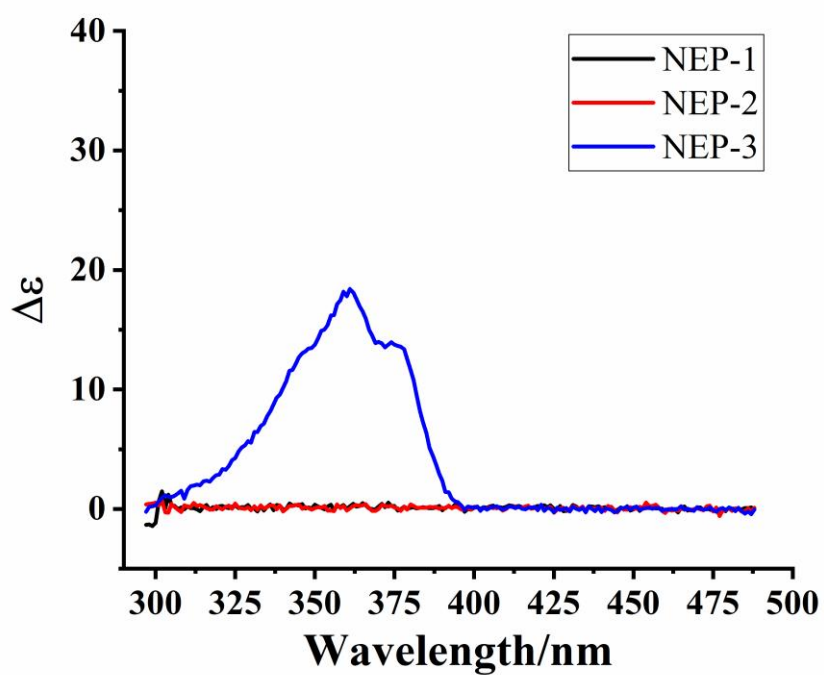

Figure S2 The circular dichroism (CD) spectra of **NEP-1**, **-2** and **-3** in  $\text{CHCl}_3$  with a concentration of 5.8 mg/mL at 25  $^\circ\text{C}$ .

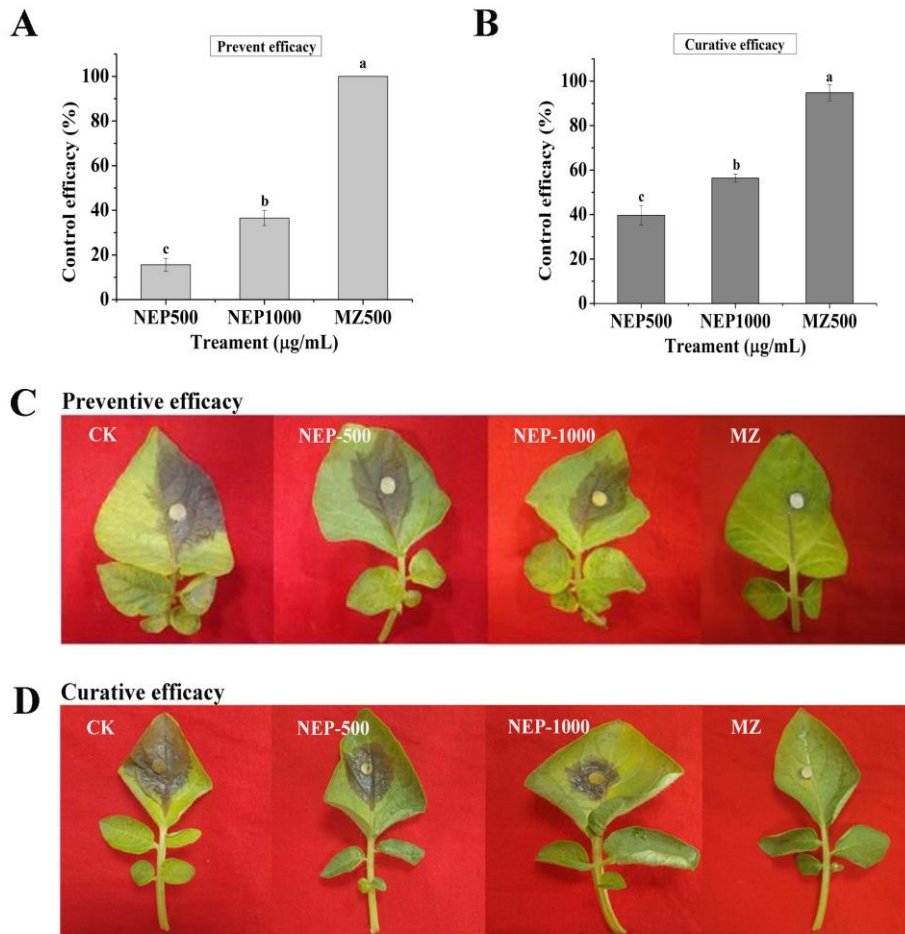

Figure S3 *In vivo* antimicrobial activity of **NEP-1** and mancozeb against *P. infestans*.  
**(A, C)** Protective activity of **NEP-1**; **(B, D)** Curative activity of **NEP-1**.  
 Preventive/curative efficacy: the control efficacy of a compound that was sprayed on potato leaves 12 h before/after inoculation with *P. infestans*. NEP500, 500  $\mu\text{g/mL}$  of **NEP-1**; NEP1000, 1000  $\mu\text{g/mL}$  of **NEP-1**; MZ: 500  $\mu\text{g/mL}$  of mancozeb.

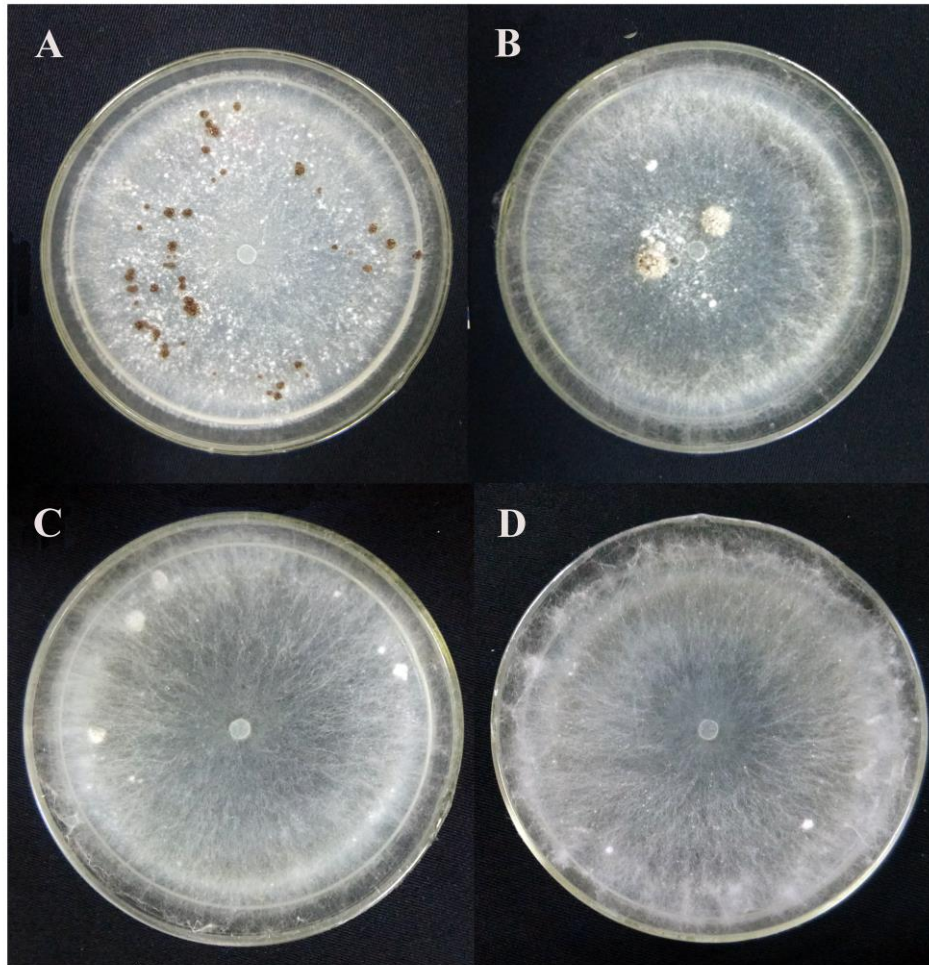

Figure S4 Effect of **NEP-1** on sclerotial formation of *R. solani*. (A) Control plate; (B) Plate treated with **NEP-1** at 15.00 µg/mL; (C) Plate treated with **NEP-1** at 20.00 µg/mL; (D) Plate treated with **NEP-1** at 30.00 µg/mL. All the plates were incubated under identical conditions for 6 days.

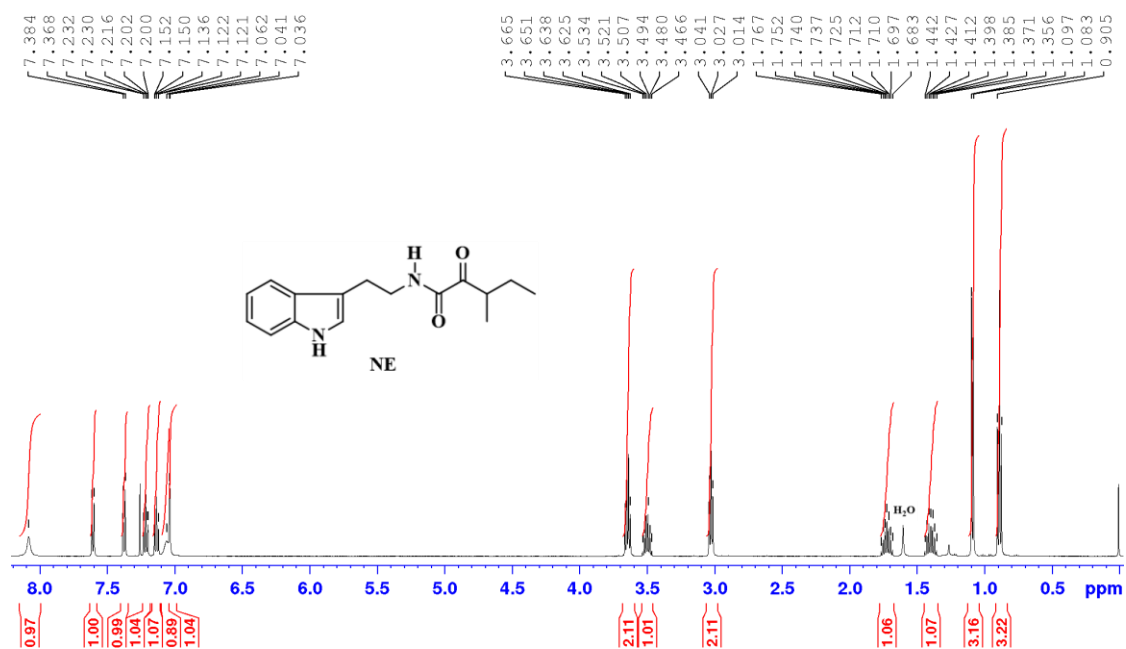

Figure S5 <sup>1</sup>H NMR spectrum of (±)-nematophin (**NEP-1**) isolated from *X. nematophila*

YL001.

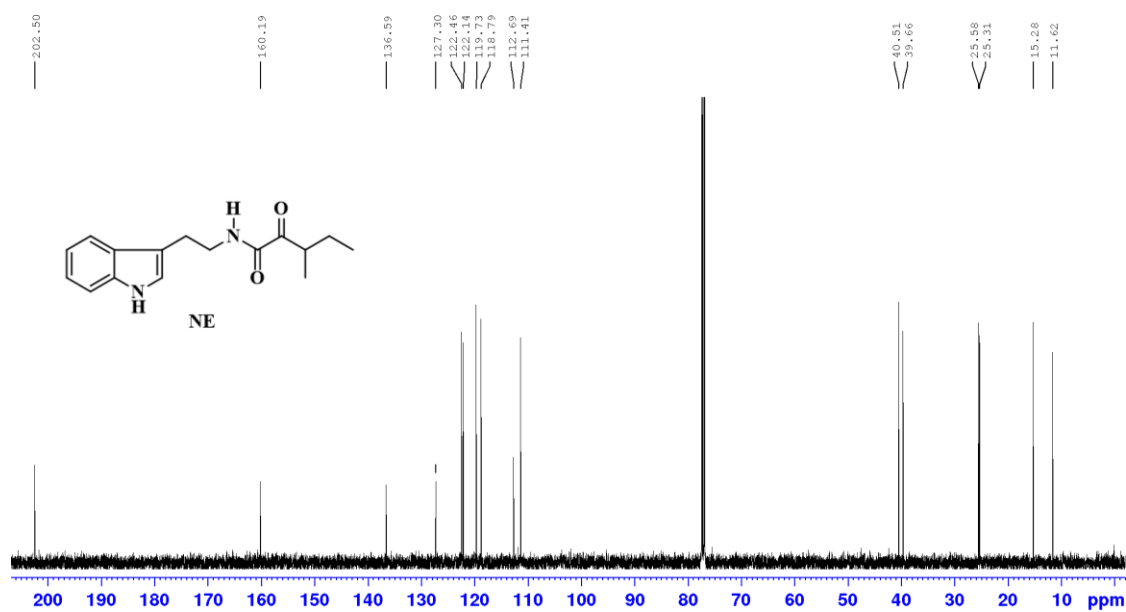

Figure S6 <sup>13</sup>C NMR spectrum of (±)-nematophin (**NEP-1**) isolated from *X. nematophila*

YL001.

ZSJ-1 #2482 RT: 4.50 AV: 1 NL: 2.31E5  
T: ITMS - c ESI Full ms [100.00-300.00]

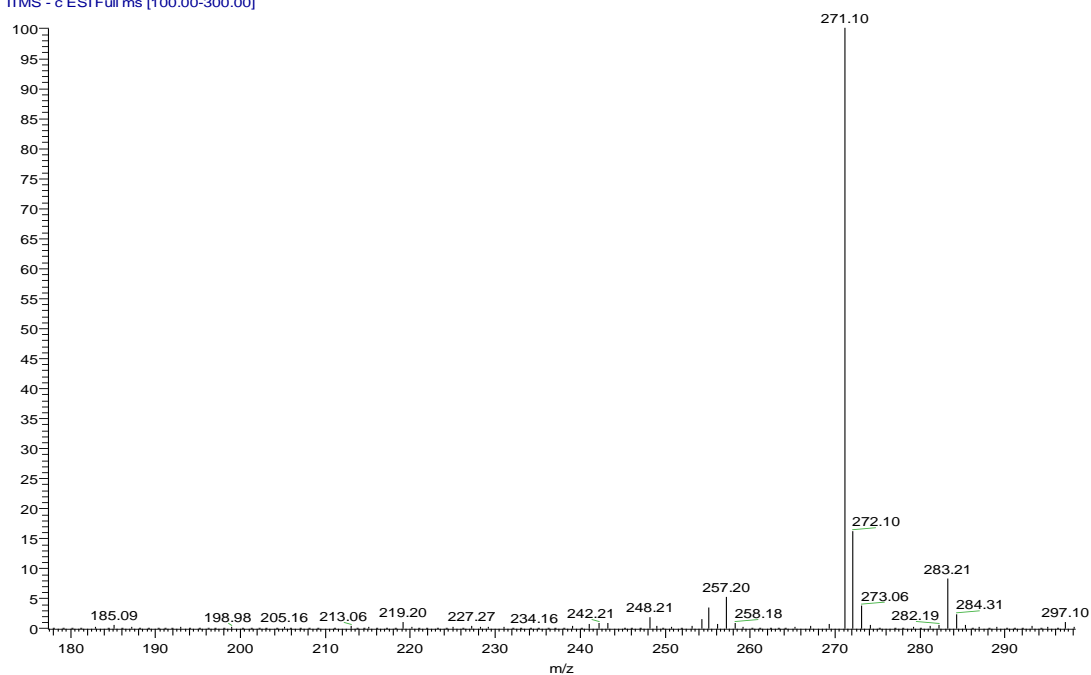

Figure S7 ESI-MS spectrum of ( $\pm$ )-nematophin (**NEP-1**) isolated from *X. nematophila* YL001.

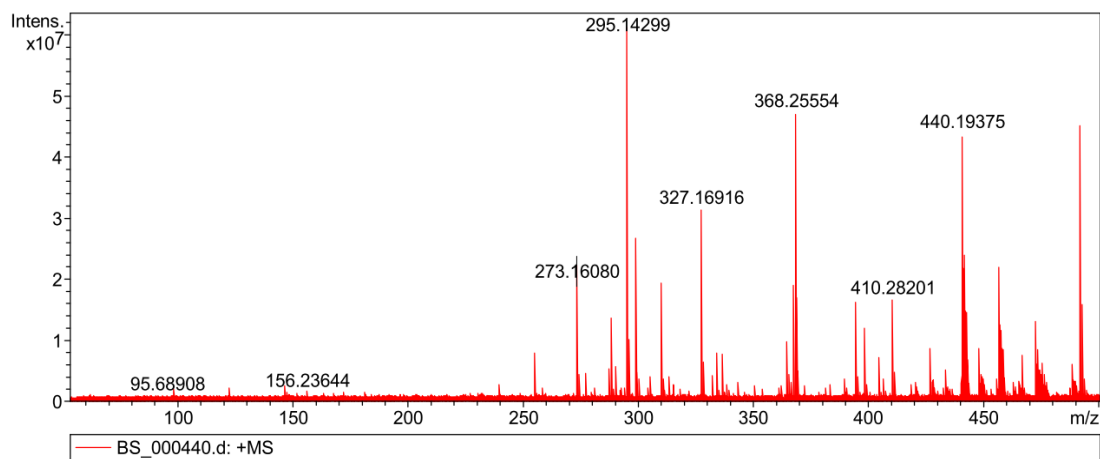

Figure S8 HRESI-MS spectrum of ( $\pm$ )-nematophin (**NEP-1**) isolated from *X. nematophila* YL001.

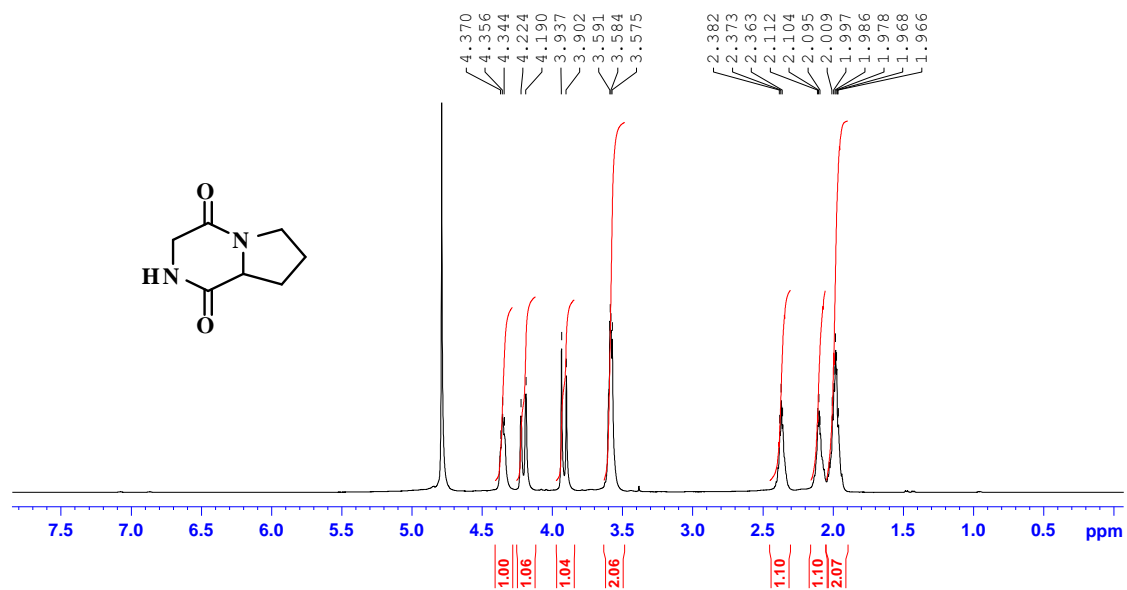

Figure S9  $^1\text{H}$  NMR spectrum of *cyclo*(L-Pro-Gly) (2).

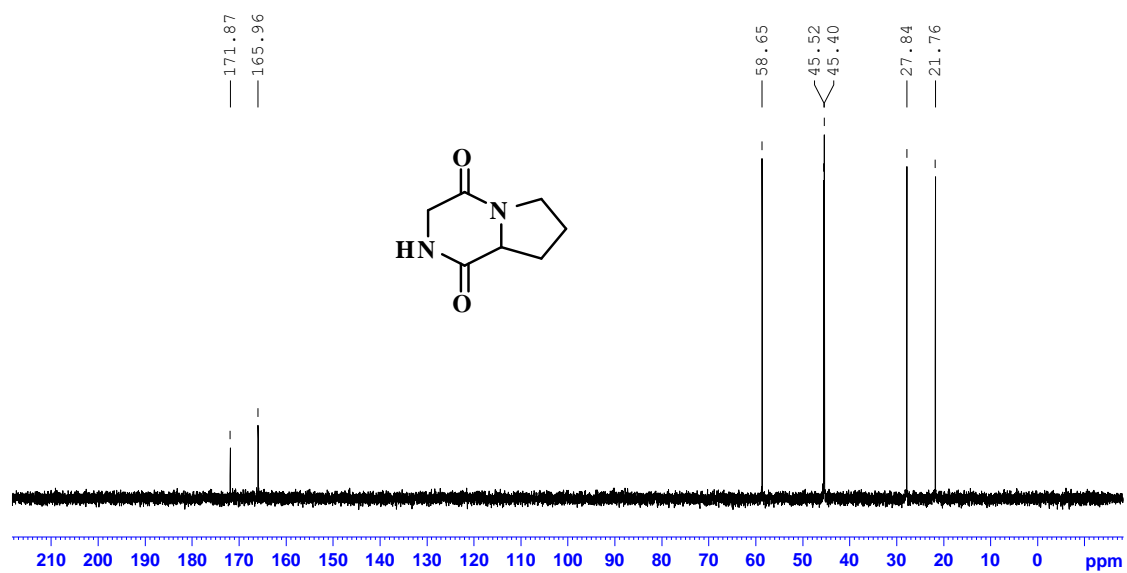

Figure S10  $^{13}\text{C}$  NMR spectrum of *cyclo*(L-Pro-Gly) (2).

ZSJ-3 #538 RT: 0.86 AV: 1 NL: 4.50E6  
T: ITMS + c ESI Full ms [100.00-200.00]

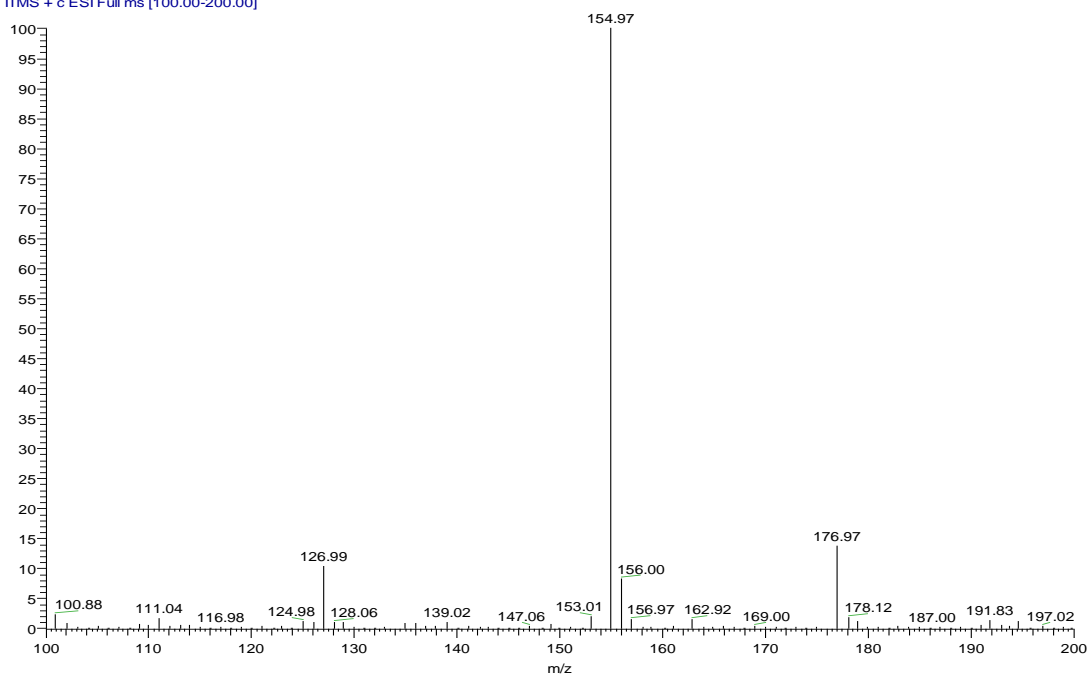

Figure S11 ESI-MS spectrum of *cyclo* (L-Pro-Gly) (2).

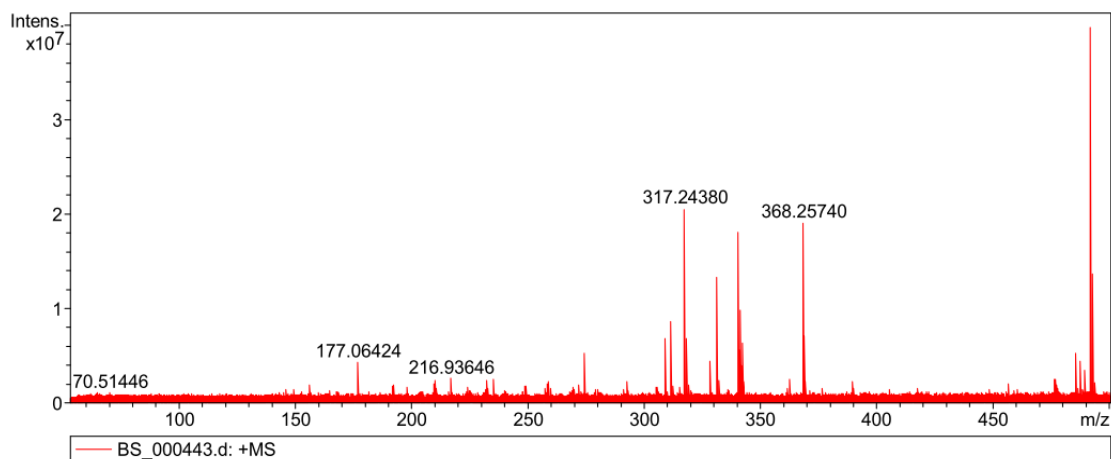

Figure S12 HRESI-MS spectrum of *cyclo* (L-Pro-Gly) (2).

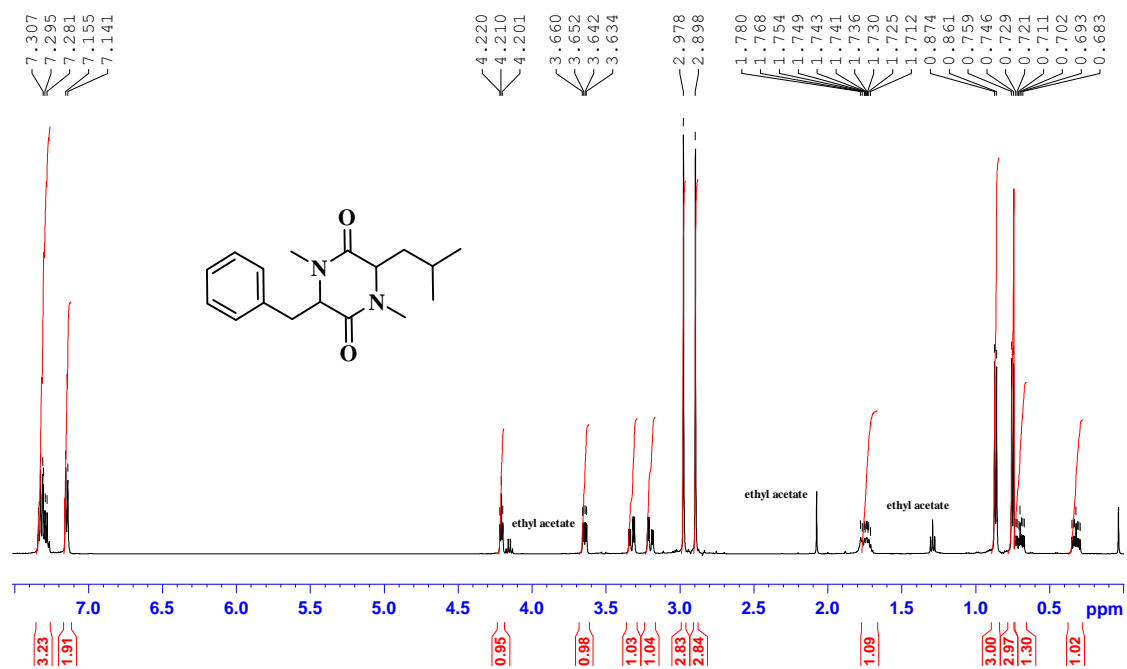

Figure S13 <sup>1</sup>H NMR spectrum of *N,N'*-dimethyl-*cyclo*(L-Phe-L-Leu) (3).

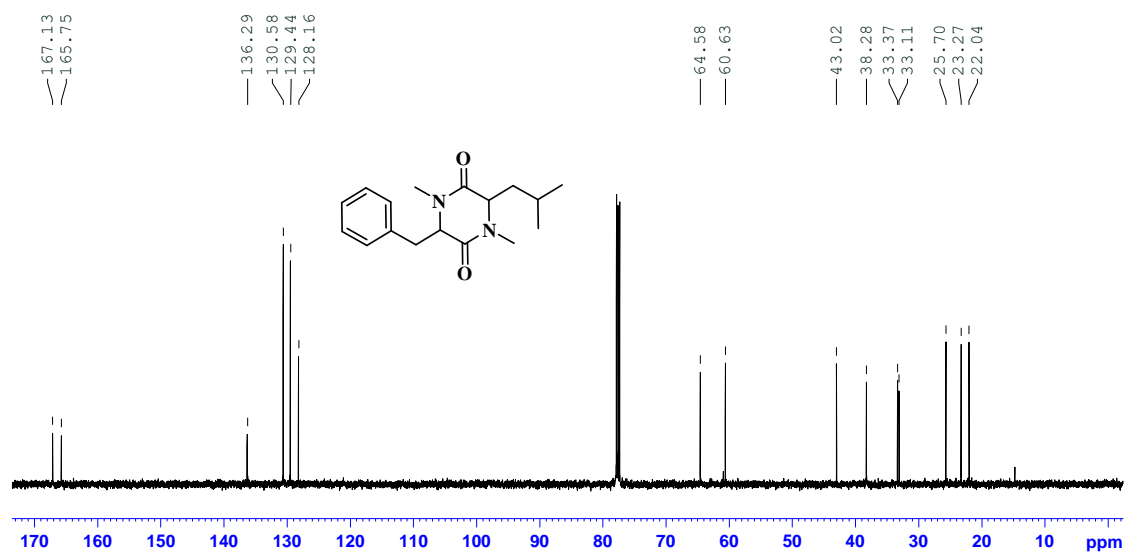

Figure S14 <sup>13</sup>C NMR spectrum of *N,N'*-dimethyl-*cyclo*(L-Phe-L-Leu) (3).



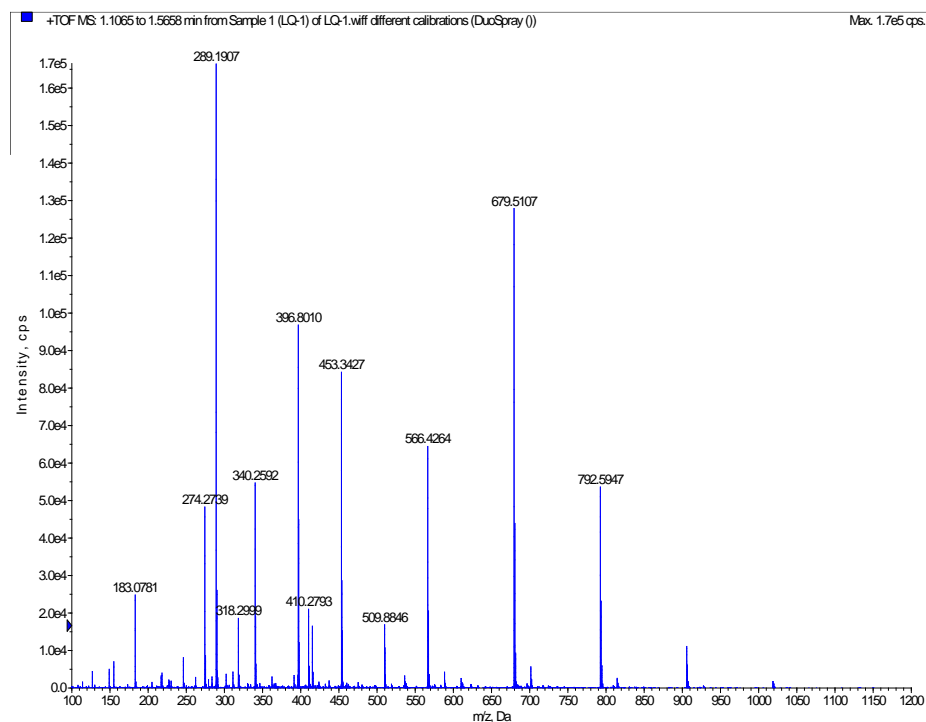

Figure S15 HRESI-MS spectrum of N, N'-dimethyl-cyclo(L-Phe-L-Leu) (**3**)

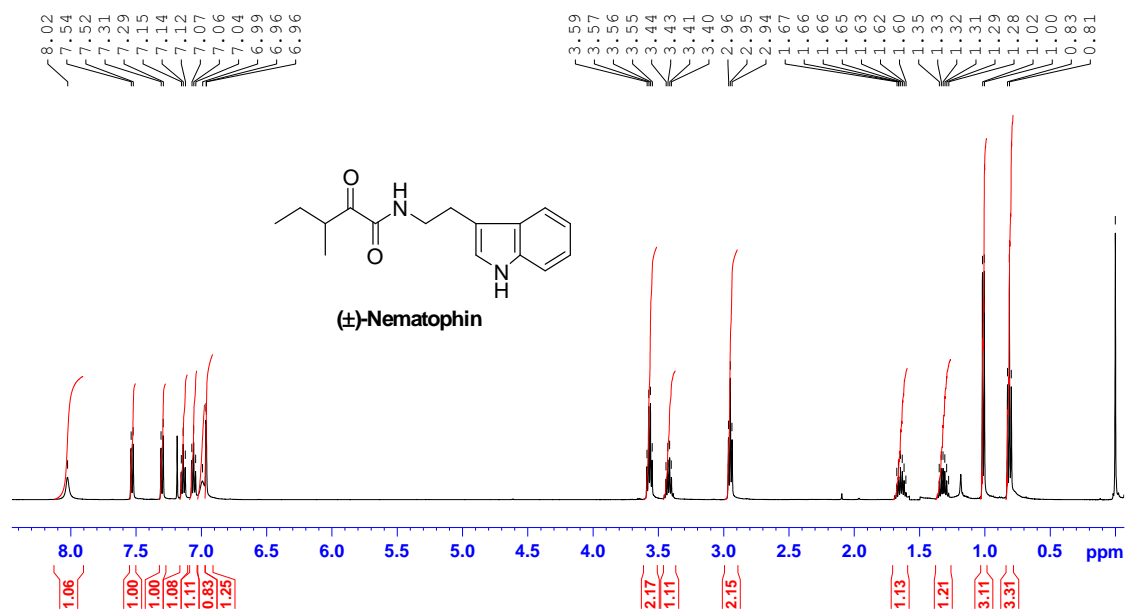

Figure S16  $^1\text{H}$  NMR spectrum of synthetic ( $\pm$ )-nematophin (**NEP-2**).

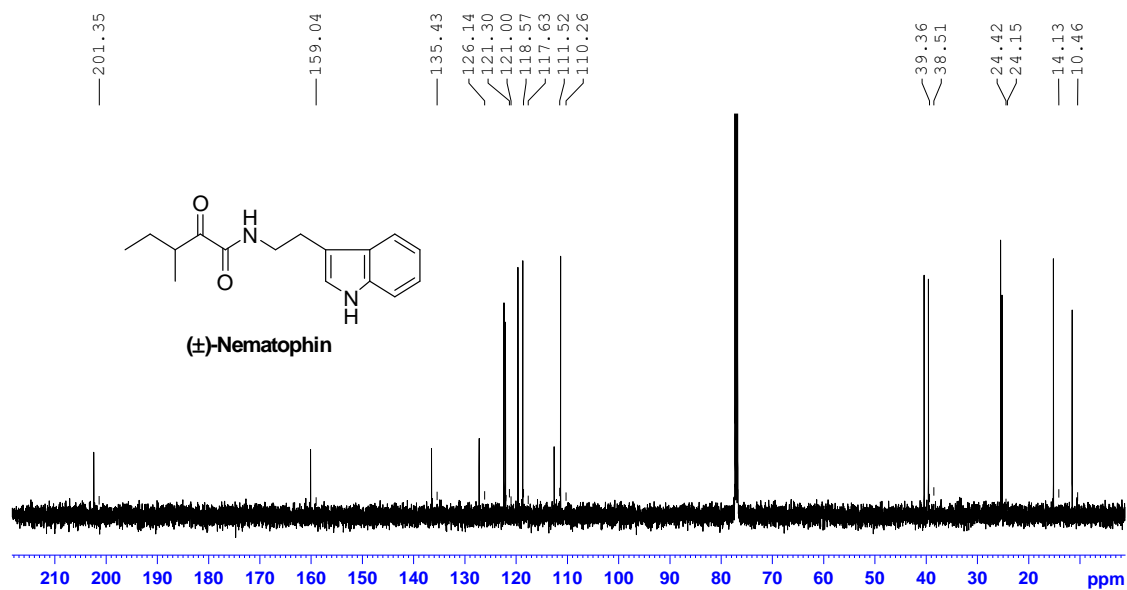

Figure S17  $^{13}\text{C}$  NMR spectrum of synthetic (±)-nematophin (**NEP-2**).

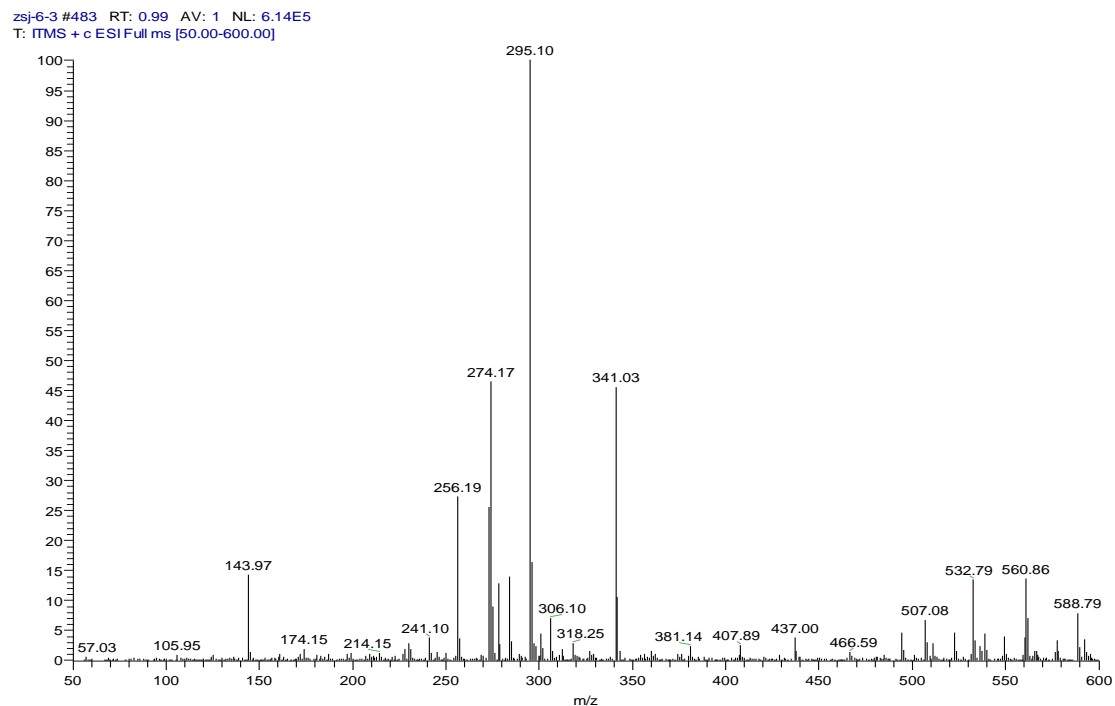

Figure S18 ESI-MS spectrum of synthetic (±)-nematophin (**NEP-2**) in positive mode.

zsj-6-3 #991 RT: 2.79 AV: 1 NL: 9.46E4  
T: ITMS - c ESI Full ms [100.00-600.00]

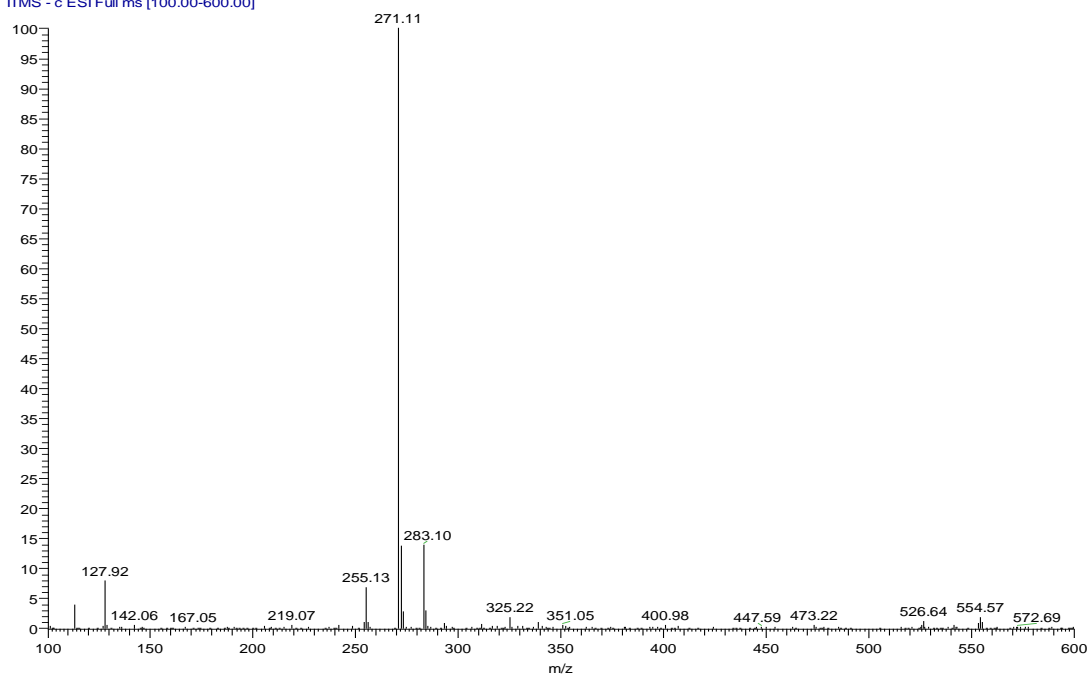

Figure S19 ESI-MS spectrum of synthetic ( $\pm$ )-nematophin (**NEP-2**) in negative mode.

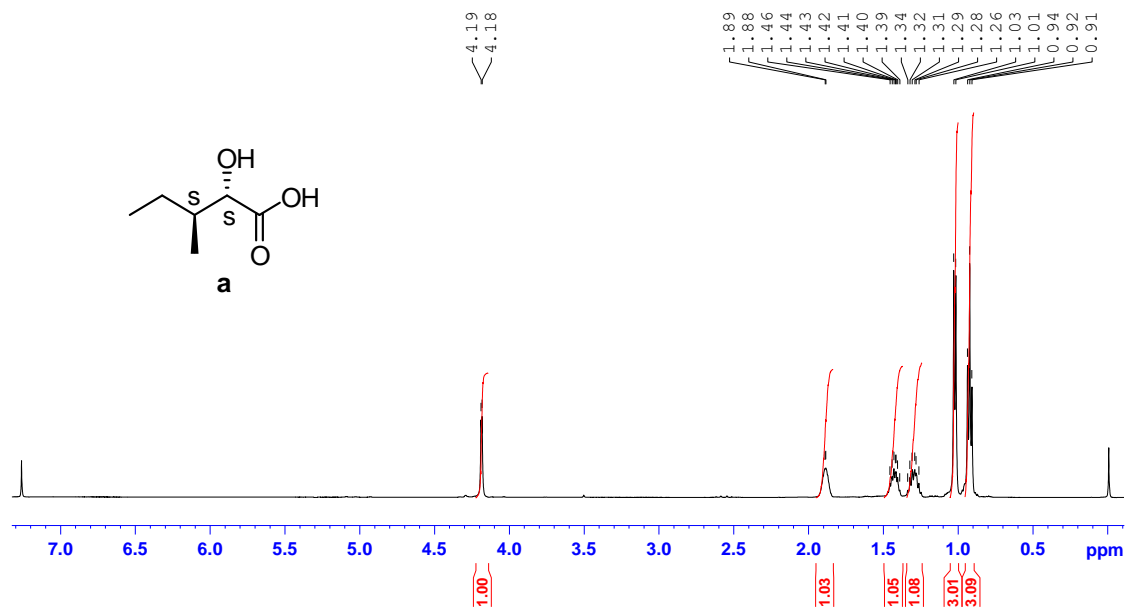

Figure S20  $^1\text{H}$  NMR spectrum of (2S,3S)-hydroxypentanoic acid (**a**).

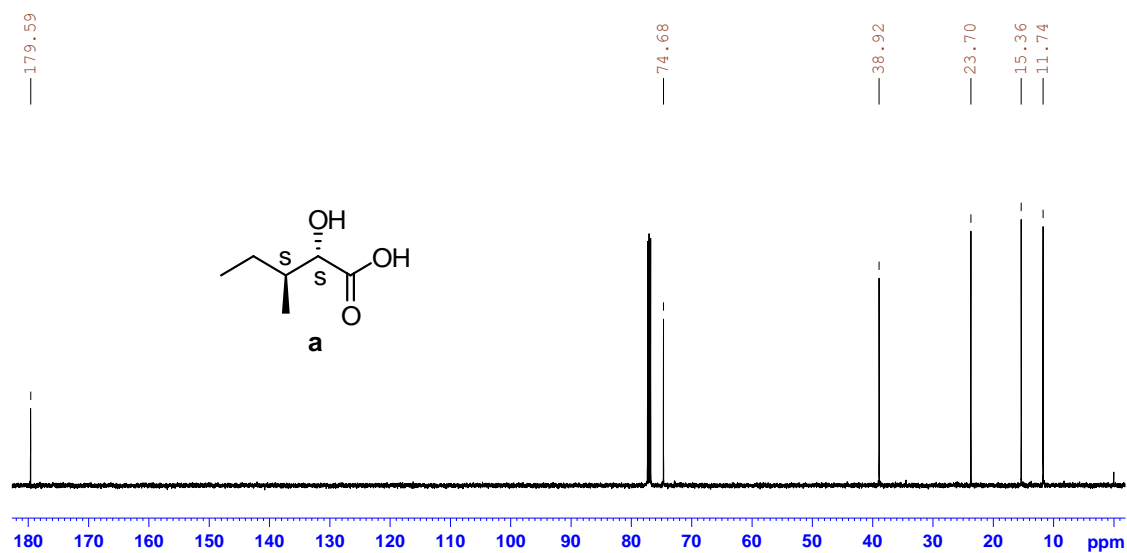

Figure S21  $^{13}\text{C}$  NMR spectrum of (2S,3S)-hydroxypentanoic acid (a).

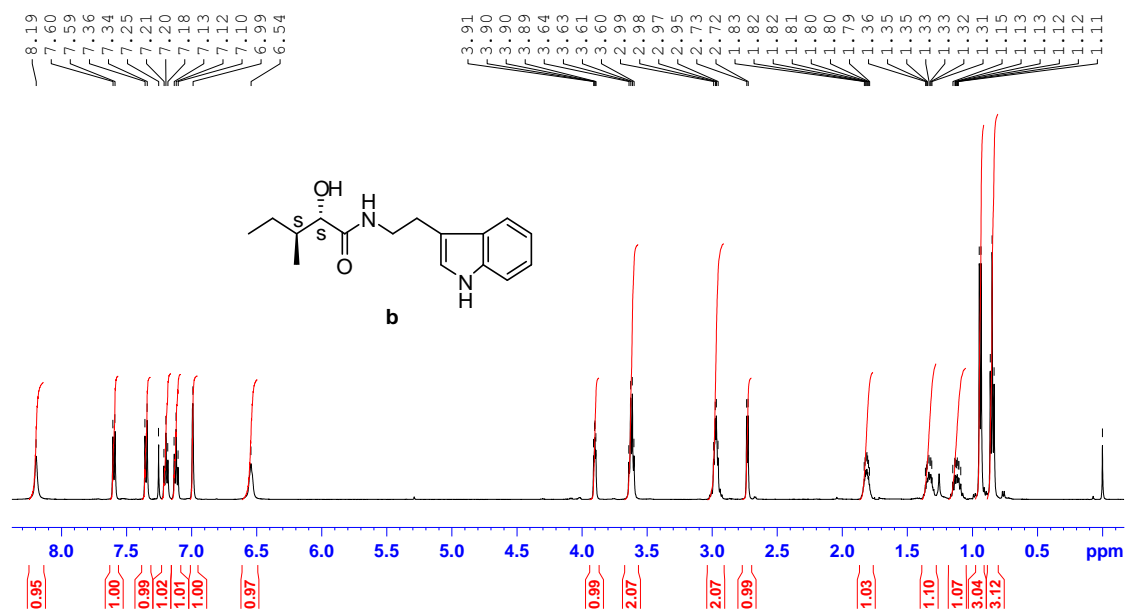

Figure S22  $^1\text{H}$  NMR spectrum of (2'S, 3'S)-N-(Indol-3-ylethyl)-2'-hydroxy-3'-methyl pentanamide (b).

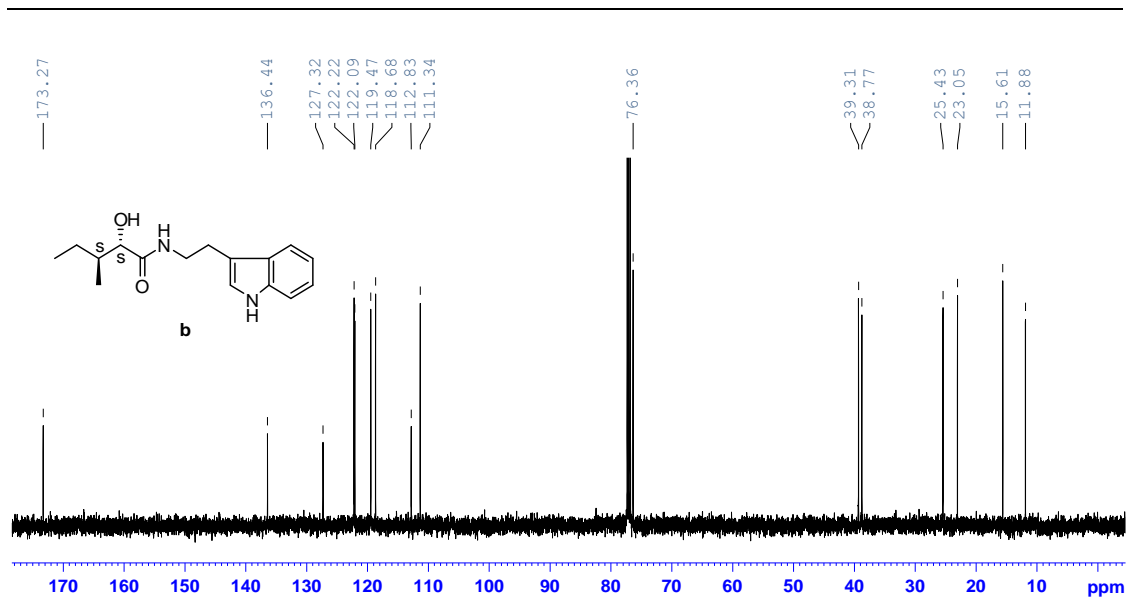

Figure S23 <sup>13</sup>C NMR spectrum of (2'S, 3'S)-N-(Indol-3-ylethyl)-2'-hydroxy-3'-methyl pentanamide (b).

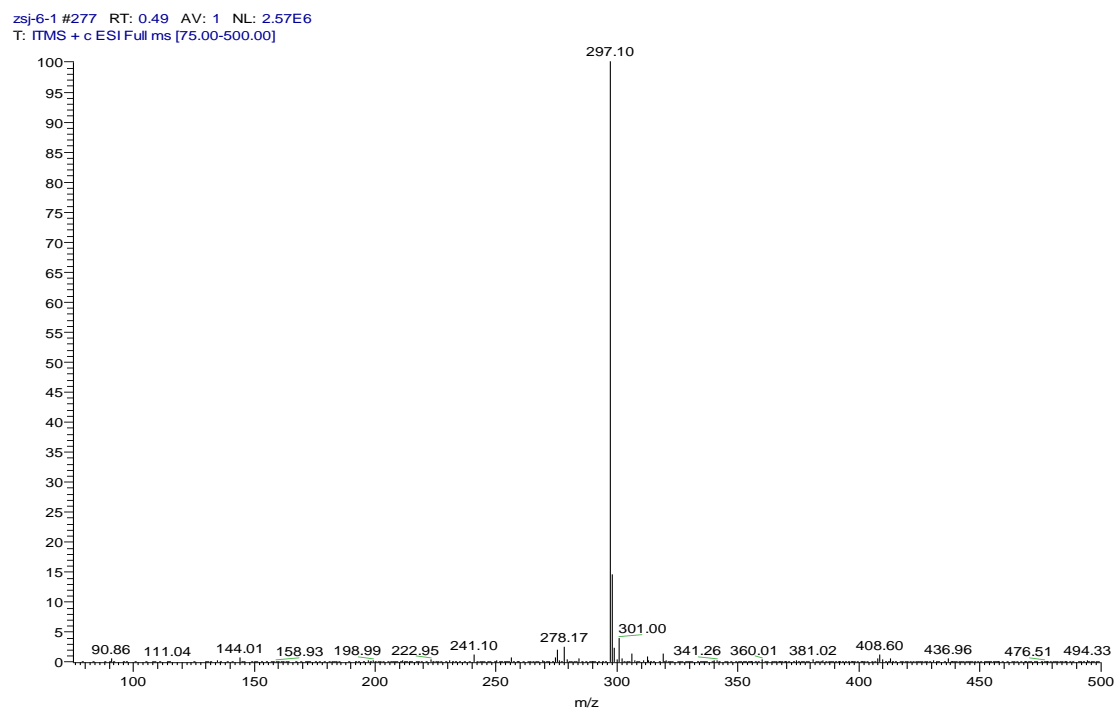

Figure S24 ESI-MS spectrum of (2'S, 3'S)-N-(Indol-3-ylethyl)-2'-hydroxy-3'-methyl pentanamide (b).

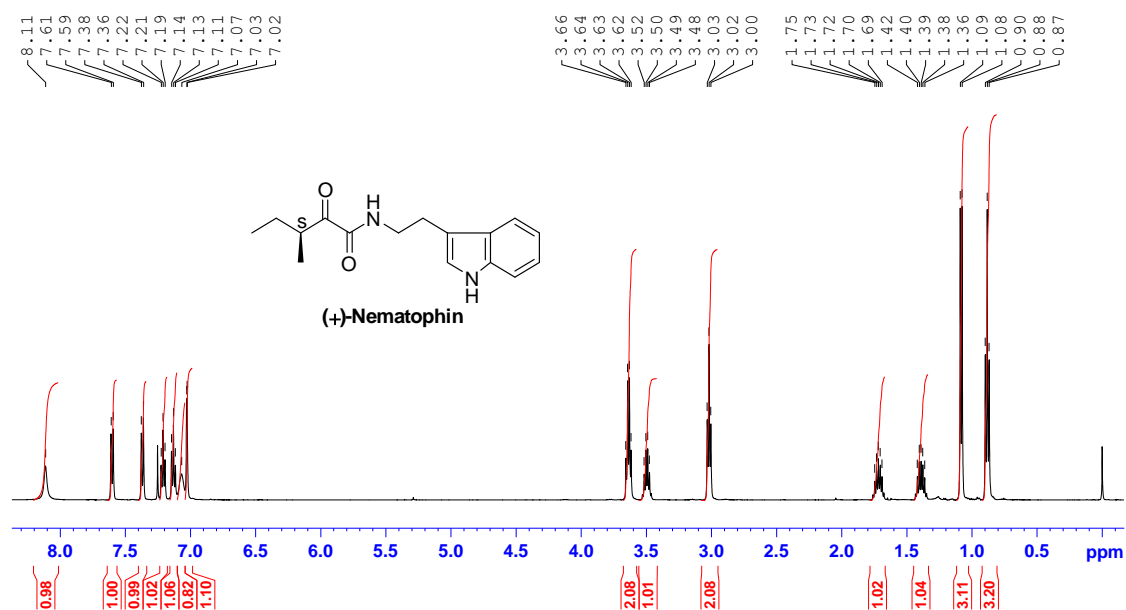

Figure S25 <sup>1</sup>H NMR spectrum of synthetic (+)-nematophin (NEP-3).

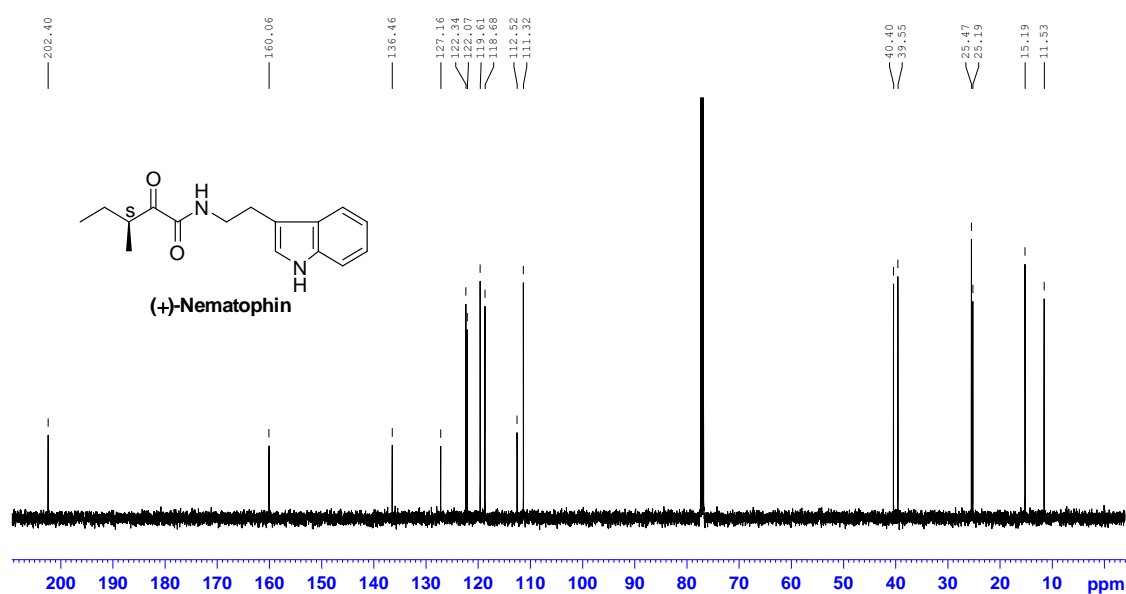

Figure S26 <sup>13</sup>C NMR spectrum of synthetic (+)-nematophin (NEP-3).

zsj-6-2 #872 RT: 1.76 AV: 1 NL: 2.97E6  
T: ITMS + c ESI Full ms [50.00-600.00]

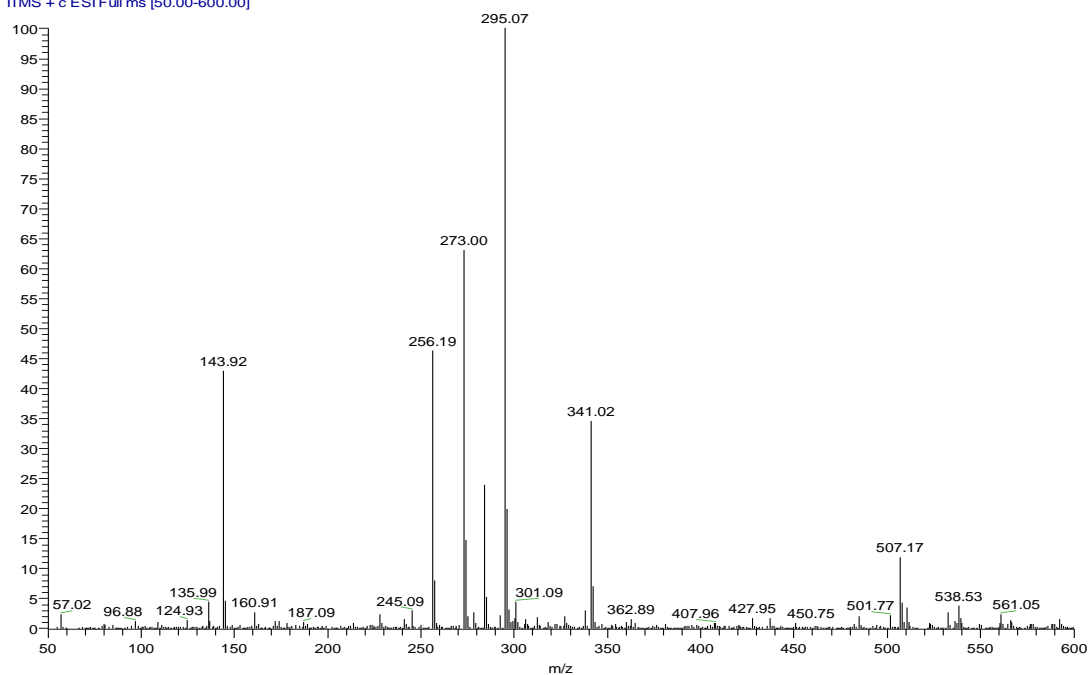

Figure S27 ESI-MS spectrum of synthetic (+)-nematophin (NEP-3) in positive mode.

zsj-6-2 #2210 RT: 4.18 AV: 1 NL: 2.91E4  
T: ITMS - c ESI Full ms [100.00-500.00]

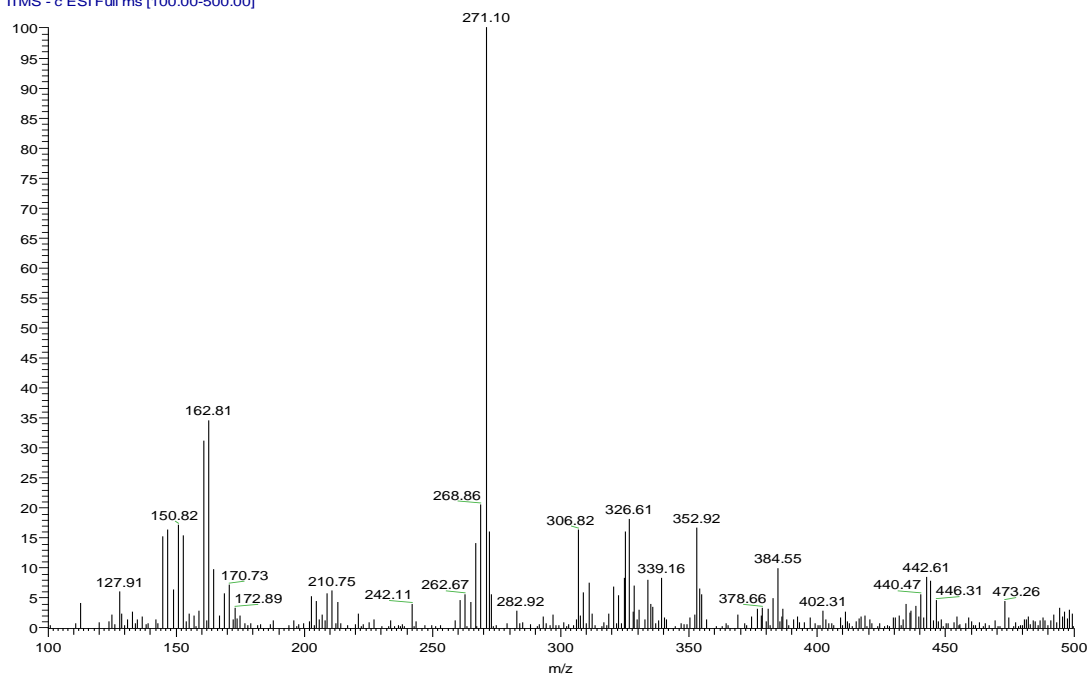

Figure S28 ESI-MS spectrum of synthetic (+)-nematophin (NEP-3) in negative mode.

---

Reference:

- Paik, S., Park, M.K., Jhun, S.H., Park, H.K., Lee, C.S., Cho, B.R., et al. (2003). Isolation and Synthesis of Tryptamine Derivatives from a Symbiotic Bacterium *Xenorhabdus nematophilus* PC. *Cheminform* 34(45), 2101-2118. doi: 10.1002/chin.200345209
- YH, Wang, X, Zhang (2006). Isolation and preliminary identification of two strains of entomopathogenic nematode symbionts. *Jour. of Northwest Sci-Tech Univ. of Agri. and For. (Nat. Sci. Ed.)*, 34(12), 174-180. doi:10.3321/j.issn:1671-9387.2006.12.034.
